# Supplementary material for: Semiautomated generation of species-specific training data from large, unlabeled acoustic datasets for deep supervised birdsong isolation
Source: PeerJ journal article supplement (doi:10.7717/peerj.17854), 2024-09-23

(A) Original

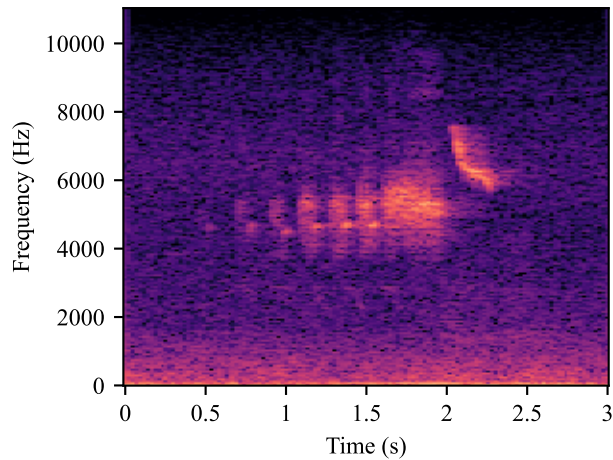

(B) After High Pass

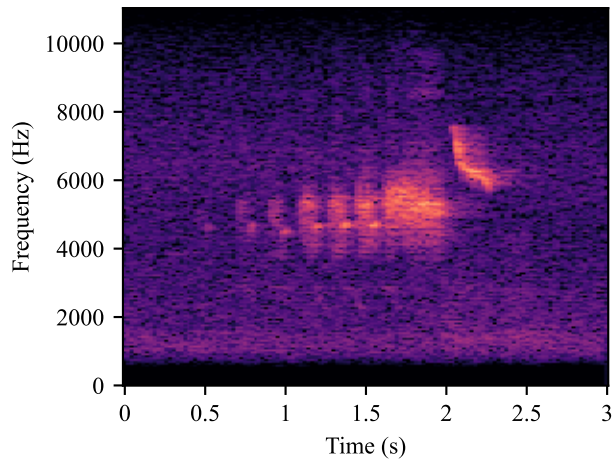

(C) After Normalization

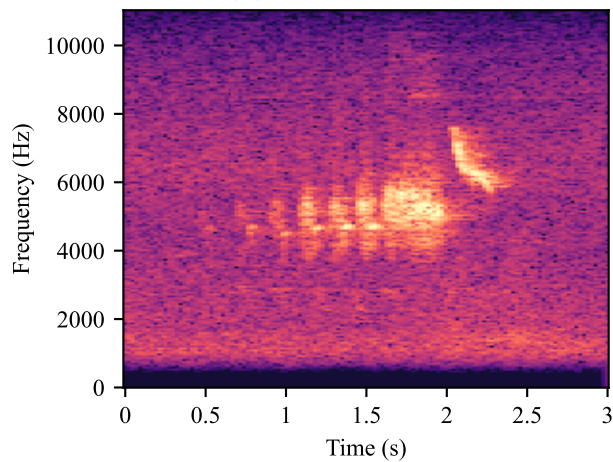

(D) After Noise Reduction

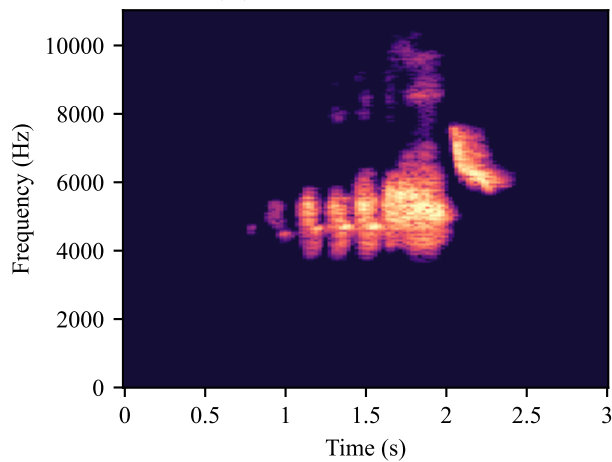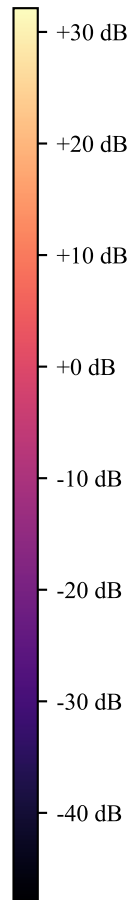

Supplement: Figure_S1.pdf [file Figure_S1.pdf]
